# Supplementary material
Source: Research Square preprint supplement (doi:10.21203/rs.3.rs-9519248/v1)
Supplement: Supplementary file 1 [file b6e0614e9f0c47e17d5900f2.pdf]

## Hippocampus

| Gene Symbol   | B16F10 IgG<br>2 <sup>-</sup> ΔCT<br>(Mean ± SEM) | B16F10 PD-1<br>2 <sup>-</sup> ΔCT<br>(Mean ± SEM),<br>p-value | B16F10 PD-L1<br>2 <sup>-</sup> ΔCT<br>(Mean ± SEM),<br>p-value | MC38 IgG<br>2 <sup>-</sup> ΔCT<br>(Mean ± SEM) | MC38 PD-1<br>2 <sup>-</sup> ΔCT<br>(Mean ± SEM),<br>p-value | MC38 PD-L1<br>2 <sup>-</sup> ΔCT<br>(Mean ± SEM),<br>p-value |
|---------------|--------------------------------------------------|---------------------------------------------------------------|----------------------------------------------------------------|------------------------------------------------|-------------------------------------------------------------|--------------------------------------------------------------|
| ARG1          | 0.0067445 ± 0.0009431                            | 0.0149475 ± 0.0075884<br>p=0.50                               | 0.0090549 ± 0.0017240<br>P>0.99                                | 0.0133699 ± 0.0050632                          | 0.0093781 ± 0.0020925<br>p=0.93                             | 0.0082522 ± 0.0025193<br>p=0.84                              |
| CCL2          | 0.0013763 ± 0.0002147                            | 0.0012922 ± 0.0002143<br>p>0.99                               | 0.0017097 ± 0.0002934<br>p>0.99                                | 0.0007517 ± 0.0002371                          | 0.0004132 ± 0.0001189<br>p>0.99                             | 0.0005801 ± 0.0001663<br>p>0.99                              |
| CCL19         | <b>0.0003817 ± 0.0000590</b>                     | 0.0013981 ± 0.0009603<br>p=0.97                               | 0.0004324 ± 0.0000484<br>p=0.99                                | 0.0006364 ± 0.0002694                          | <b>0.0093781 ± 0.0020925</b><br>***, p=0.0003               | <b>0.0082522 ± 0.0025193</b><br>**, p=0.002                  |
| CCL21         | 0.0000267 ± 0.0000096                            | 0.0001074 ± 0.0000789<br>p>0.99                               | 0.0000492 ± 0.0000125<br>p>0.99                                | 0.0001588 ± 0.0000603                          | 0.0019292 ± 0.0018877<br>p>0.99                             | 0.0046654 ± 0.0046281<br>p=0.95                              |
| CD4           | 0.0002682 ± 0.0000288                            | 0.0018002 ± 0.0015978<br>p=0.80                               | 0.0002816 ± 0.0000515<br>p>0.99                                | 0.0017776 ± 0.0011500                          | 0.0002997 ± 0.0000611<br>p=0.86                             | 0.0004333 ± 0.0000911<br>p>0.99                              |
| CD8A          | 0.0000578 ± 0.0000162                            | 0.0004255 ± 0.0003614<br>p>=0.99                              | 0.0000763 ± 0.0000292<br>p>0.99                                | 0.0001661 ± 0.0001237                          | 0.0000813 ± 0.0000192<br>p>0.99                             | 0.0000990 ± 0.0000406<br>p>0.99                              |
| CD8B          | 0.0028036 ± 0.0015292                            | 0.0018914 ± 0.0006171<br>p>0.99                               | 0.0012733 ± 0.0005952<br>p>0.99                                | 0.0025207 ± 0.0011346                          | 0.0012208 ± 0.0002994<br>p>0.99                             | 0.0009680 ± 0.0003293<br>p=0.60                              |
| ITGAM (CD11b) | 0.0415633 ± 0.0068409                            | 0.0378463 ± 0.0041501<br>p>0.99                               | 0.0440255 ± 0.0039618<br>p>0.99                                | 0.0244942 ± 0.0042802                          | 0.0337442 ± 0.0062526<br>p=0.87                             | 0.0216065 ± 0.0050506<br>p>0.99                              |
| ITGAX (CD11c) | 0.0000406 ± 0.0000164                            | 0.0003735 ± 0.0003488<br>p>0.99                               | 0.0000602 ± 0.0000246<br>p>0.99                                | 0.0038039 ± 0.0036618                          | 0.0000879 ± 0.0000216<br>p=0.50                             | 0.0000719 ± 0.0000248<br>p=0.62                              |
| CD14          | 0.0055400 ± 0.0007871                            | 0.0269412 ± 0.0211175<br>p>0.99                               | 0.0071636 ± 0.0022949<br>p>0.99                                | 0.0266960 ± 0.0144054                          | 0.0087711 ± 0.0019387<br>p=0.99                             | 0.0063844 ± 0.0019771<br>p=0.91                              |
| CD19          | 0.0051376 ± 0.0011001                            | 0.0039557 ± 0.0006161<br>p>0.99                               | 0.0052230 ± 0.0004111<br>p>0.99                                | 0.0029670 ± 0.0008266                          | 0.0034033 ± 0.0006155<br>p>0.99                             | 0.0030622 ± 0.0006975<br>p>0.99                              |
| CD80          | 0.0003818 ± 0.0000809                            | 0.0003344 ± 0.0000566<br>p>0.99                               | 0.0003589 ± 0.0000384<br>p>0.99                                | 0.0001773 ± 0.0000649                          | 0.0003462 ± 0.0000515<br>p=0.25                             | 0.0003015 ± 0.0000613<br>p=0.66                              |

|        |                          |                                            |                                    |                             |                                    |                                    |
|--------|--------------------------|--------------------------------------------|------------------------------------|-----------------------------|------------------------------------|------------------------------------|
| CD86   | 0.0009511 ±<br>0.0001611 | 0.0007966<br>±<br>0.0001741<br>p>0.99      | 0.0011831 ±<br>0.0001514<br>p>0.99 | 0.0020223<br>±<br>0.0012258 | 0.0051437 ±<br>0.0030561<br>p>0.99 | 0.0014088 ±<br>0.0003630<br>p>0.99 |
| CGAS   | 0.0005005 ±<br>0.0000572 | 0.0004475<br>±<br>0.0000856<br>±<br>p>0.99 | 0.0005190 ±<br>0.0000718<br>p>0.99 | 0.0003034<br>±<br>0.0000499 | 0.0003657 ±<br>0.0000738<br>p>0.99 | 0.0004359 ±<br>0.0000862<br>p=0.88 |
| CHI3L3 | 0.0024243 ±<br>0.0004485 | 0.0042919<br>0.0023536<br>p>0.99           | 0.0028082 ±<br>0.0003072<br>p>0.99 | 0.0026799<br>±<br>0.0008343 | 0.0026339 ±<br>0.0005533<br>p>0.99 | 0.0022969 ±<br>0.0005736<br>p>0.99 |
| CSF1   | Undetermined             | Undetermined                               | Undetermined                       | Undetermined                | Undetermined                       | Undetermined                       |
| CSF2   | 0.0001970 ±<br>0.0000397 | 0.0003031<br>±<br>0.0000818<br>p>0.99      | 0.0002092 ±<br>0.0000395<br>p>0.99 | 0.0016664<br>±<br>0.0014915 | 0.0002997 ±<br>0.0000759<br>p=0.62 | 0.0001734 ±<br>0.0000523<br>p=0.56 |
| CXCL12 | 0.0021006 ±<br>0.0002500 | 0.0035411<br>±<br>0.0007081<br>p=0.44      | 0.0021131 ±<br>0.0003000<br>p>0.99 | 0.0034343<br>±<br>0.0010051 | 0.0077324 ±<br>0.0040751<br>p>0.99 | 0.0044830 ±<br>0.0018730<br>p>0.99 |
| CX3CL1 | 0.0409684 ±<br>0.0047587 | 0.0441273<br>±<br>0.0024195<br>p>0.99      | 0.0422356 ±<br>0.0014890<br>p>0.99 | 0.0280336<br>±<br>0.0036311 | 0.0523864 ±<br>0.0135968<br>p=0.36 | 0.0368849 ±<br>0.0106001<br>p>0.99 |
| FOXP3  | 0.0000664 ±<br>0.0000225 | 0.0002107<br>±<br>0.0001635<br>p>0.99      | 0.0000632 ±<br>0.0000182<br>p>0.99 | 0.0068721<br>±<br>0.0067988 | 0.0001395 ±<br>0.0000564<br>p=0.30 | 0.0000718 ±<br>0.0000215<br>p>0.99 |
| INFG   | 0.0580796 ±<br>0.0061225 | 0.1261078<br>±<br>0.0582322<br>p=0.32      | 0.0733725 ±<br>0.0121845<br>p>0.99 | 0.0797533<br>±<br>0.0124105 | 0.0970576 ±<br>0.0139338<br>p>0.99 | 0.0602412 ±<br>0.0145605<br>p>0.99 |
| IL1A   | 0.0001029 ±<br>0.0000342 | 0.0000846<br>±<br>0.0000237<br>p>0.99      | 0.0000817 ±<br>0.0000233<br>p>0.99 | 0.0000382<br>±<br>0.0000075 | 0.0001669 ±<br>0.0000990<br>p>0.99 | 0.0001352 ±<br>0.0000913<br>p>0.99 |
| IL1B   | 0.0015101 ±<br>0.0002277 | 0.0023820<br>±<br>0.0008399<br>p>0.99      | 0.0016860 ±<br>0.0002187<br>p>0.99 | 0.0066885<br>±<br>0.0044030 | 0.0019082 ±<br>0.0005565<br>p=0.25 | 0.0014162 ±<br>0.0003448<br>p=0.17 |
| IL2    | 0.0031988 ±<br>0.0003246 | 0.0063271<br>±<br>0.0022036<br>p=0.16      | 0.0041177 ±<br>0.0004506<br>p>0.99 | 0.0039404<br>±<br>0.0004708 | 0.0046377 ±<br>0.0004423<br>p>0.99 | 0.0034795 ±<br>0.0007367<br>p>0.99 |
| IL4    | Undetermined             | Undetermined                               | Undetermined                       | Undetermined                | Undetermined                       | Undetermined                       |
| IL6    | 0.0002311 ±<br>0.0000407 | 0.0104853<br>±<br>0.0097558<br>p=0.09      | 0.0003881 ±<br>0.0000480<br>p=0.78 | 0.0113390<br>±<br>0.0078921 | 0.0012540 ±<br>0.0006164<br>p>0.99 | 0.0005991 ±<br>0.0001503<br>p=0.54 |
| IL10   | 0.0987414 ±<br>0.0165440 | 0.0737602<br>±<br>0.0135242                | 0.1270429 ±<br>0.0234479<br>p>0.99 | 0.0780419<br>±<br>0.0190012 | 0.1216931 ±<br>0.0210763<br>p=0.49 | 0.0970067 ±<br>0.0210041<br>p>0.99 |

|             |                          |                                       |                                    |                             |                                    |                                           |
|-------------|--------------------------|---------------------------------------|------------------------------------|-----------------------------|------------------------------------|-------------------------------------------|
|             |                          | p>0.99                                |                                    |                             |                                    |                                           |
| IL12        | 0.6087308 ±<br>0.0612123 | 0.7615834<br>±<br>0.0643774<br>p>0.99 | 0.6868139 ±<br>0.0817340<br>p>0.99 | 0.4945699<br>±<br>0.1208605 | 0.5754466 ±<br>0.1429042<br>p>0.99 | 0.4159060 ±<br>0.1324806<br>p>0.99        |
| IL17        | 0.0014363 ±<br>0.0002551 | 0.0035135<br>±<br>0.0017572<br>p=0.87 | 0.0018372 ±<br>0.0002799<br>p>0.99 | 0.0120318<br>±<br>0.0096357 | 0.0021370 ±<br>0.0004428<br>p>0.99 | 0.0036143 ±<br>0.0009588<br>p>0.99        |
| IL23A       | 0.0001155 ±<br>0.0000150 | 0.0007040<br>±<br>0.0005614<br>p=0.90 | 0.0001620 ±<br>0.0000139<br>p=0.85 | 0.0002665<br>±<br>0.0001403 | 0.0002124 ±<br>0.0000368<br>p>0.99 | 0.0012641 ±<br>0.0009168<br>p>0.99        |
| LTA         | 0.0000291 ±<br>0.0000058 | 0.0001227<br>±<br>0.0000695<br>p=0.60 | 0.0000561 ±<br>0.0000221<br>p>0.99 | 0.0000645<br>±<br>0.0000269 | 0.0000731 ±<br>0.0000225<br>p>0.99 | 0.0000554 ±<br>0.0000180<br>p>0.99        |
| <b>LTB</b>  | 0.0378029 ±<br>0.0044104 | 0.0810215<br>±<br>0.0236368<br>p=0.85 | 0.0447666 ±<br>0.0079945<br>p>0.99 | 0.1217781<br>±<br>0.0463359 | 0.0681839 ±<br>0.0220509<br>p=0.50 | 0.0375644 ±<br>0.0147469<br><b>p=0.07</b> |
| MRC1        | 0.0064997 ±<br>0.0013135 | 0.0130289<br>±<br>0.0066500<br>p>0.99 | 0.0090020 ±<br>0.0018591<br>p>0.99 | 0.0102726<br>±<br>0.0018829 | 0.0126278 ±<br>0.0030638<br>p>0.99 | 0.0077288 ±<br>0.0018462<br>p>0.99        |
| NOS2        | 0.0252442 ±<br>0.0038579 | 0.0251138<br>±<br>0.0039587<br>p>0.99 | 0.0313684 ±<br>0.0049393<br>p>0.99 | 0.0240401<br>±<br>0.0063295 | 0.0297323 ±<br>0.0038780<br>p>0.99 | 0.0249036 ±<br>0.0047086<br>p>0.99        |
| PD1         | 0.0050931 ±<br>0.0010406 | 0.0259486<br>±<br>0.0212001<br>p>0.99 | 0.0065762 ±<br>0.0018970<br>p>0.99 | 0.0159212<br>±<br>0.0072419 | 0.0095585 ±<br>0.0013903<br>p>0.99 | 0.0050935 ±<br>0.0021159<br>p>0.99        |
| PDL1        | 0.0066205 ±<br>0.0008299 | 0.0148009<br>±<br>0.0076520<br>p>0.99 | 0.0077951 ±<br>0.0007904<br>p>0.99 | 0.0149422<br>±<br>0.0080101 | 0.0108187 ±<br>0.0023389<br>p=0.88 | 0.0045456 ±<br>0.0017148<br>p=0.79        |
| P2RY12      | 0.0001077 ±<br>0.0000362 | 0.0008682<br>±<br>0.0008048<br>p>0.99 | 0.0002776 ±<br>0.0001720<br>p>0.99 | 0.0028472<br>±<br>0.0024862 | 0.0103421 ±<br>0.0099846<br>p=0.43 | 0.0127510 ±<br>0.0126528<br>p>0.99        |
| RORC        | 0.0005961 ±<br>0.0000850 | 0.0006956<br>±<br>0.0001581<br>p>0.99 | 0.0007241 ±<br>0.0001105<br>p>0.99 | 0.0051008<br>±<br>0.0044991 | 0.0009648 ±<br>0.0001702<br>p=0.48 | 0.0007334 ±<br>0.0001535<br>p=0.41        |
| STING1      | 0.0111267 ±<br>0.0012241 | 0.0191055<br>±<br>0.0040668<br>p=0.12 | 0.0124083 ±<br>0.0011101<br>p>0.99 | 0.0156044<br>±<br>0.0029564 | 0.0113495 ±<br>0.0023295<br>p=0.94 | 0.0089138 ±<br>0.0019543<br>p=0.26        |
| <b>TGFB</b> | 0.0000225 ±<br>0.0000029 | 0.0005618<br>±<br>0.0005300<br>p>0.99 | 0.0000471 ±<br>0.0000149<br>p>0.99 | 0.0003128<br>±<br>0.0001555 | 0.0012359 ±<br>0.0009908<br>p>0.99 | 0.0002796 ±<br>0.0001444<br>p>0.99        |
| TLR2        | 0.0000945 ±<br>0.0000239 | 0.0013860<br>±                        | 0.0002029 ±<br>0.0001168           | 0.0004897<br>±              | 0.0006134 ±<br>0.0003254           | 0.0002207 ±<br>0.0000364                  |

|        |                          |                     |                          |                |                          |                          |
|--------|--------------------------|---------------------|--------------------------|----------------|--------------------------|--------------------------|
|        |                          | 0.0013206<br>p>0.99 | p>0.99                   | 0.0003056      | p>0.99                   | p>0.99                   |
| TLR4   | 0.0003838 ±<br>0.0000848 | 0.0004083<br>±      | 0.0005238 ±<br>0.0001666 | 0.0069910<br>± | 0.0016497 ±<br>0.0007895 | 0.0006330 ±<br>0.0001757 |
|        |                          | 0.0000892<br>p>0.99 | p>0.99                   | 0.0047787      | p>0.99                   | p>0.99                   |
| TNFA   | 0.0001947 ±<br>0.0000462 | 0.0002652<br>±      | 0.0001916 ±<br>0.0000291 | 0.0020737<br>± | 0.0005064 ±<br>0.0003262 | 0.0004869 ±<br>0.0002938 |
|        |                          | 0.0000805<br>p>0.99 | p>0.99                   | 0.0018562      | p>0.99                   | p>0.99                   |
| TREMP2 | 0.0046420 ±<br>0.0007359 | 0.0048172<br>±      | 0.0058668 ±<br>0.0004943 | 0.0042815<br>± | 0.0072111 ±<br>0.0018029 | 0.0063665 ±<br>0.0019738 |
|        |                          | 0.0010888<br>p>0.99 | p=0.66                   | 0.0012343      | p>0.99                   | p>0.99                   |
| VEGFC  | 0.0445284 ±<br>0.0046409 | 0.0385082<br>±      | 0.0525114 ±<br>0.0151911 | 0.0269912<br>± | 0.0226125 ±<br>0.0074847 | 0.0219480 ±<br>0.0054654 |
|        |                          | 0.0064324<br>p>0.99 | p>0.99                   | 0.0063351      | p>0.99                   | p>0.99                   |

**Table S1. mRNA transcript levels of neuroinflammatory genes in the dura mater meningeal layer of cancer-bearing mice treated or not with immune check point inhibitors.** Quantitative RT-PCR analysis of inflammatory gene expression in isolated meninges. Data are expressed as mean ± SEM of  $2^{-\Delta\Delta CT}$  where  $\Delta\Delta CT = Ct_{\text{target}} - Ct_{\text{ACTB}}$ . ACTB (*beta-actin*) was used as the reference gene (n=3-7). Statistical analyses were performed by One-way ANOVA with Dunnett' or Sidak's multiple comparisons test or Kruskal-Wallis with Dunn's multiple comparisons test. Significantly modified genes are in bold.

| <b>Antibody</b>                                                    | <b>Purchaser</b>    | <b>Dilution</b> | <b>Host</b> | <b>Reference</b> |
|--------------------------------------------------------------------|---------------------|-----------------|-------------|------------------|
| CD206                                                              | R&D systems         | 1:1000          | goat        | AF2535           |
| MHCII                                                              | Invitrogen          | 1:1000          | rat         | 14-5321-82       |
| Cd11b                                                              | Abcam               | 1:200           | rabbit      | ab133357         |
| Gr1                                                                | Fisher Scientific   | 1:500           | rat         | 14-5931-85       |
| Collagen IV                                                        | Novus Biologicals   | 1:1000          | rabbit      | NB120-6586       |
| Meca-79                                                            | Santa Cruz          | 1:100           | rat         | sc-19602         |
| PD-L1                                                              | Abcam               | 1:500           | rabbit      | AB213480-1001    |
| CD8                                                                | Abcam               | 1:100           | rat         | ab22378          |
| ICAM-1                                                             | Abcam               | 1:500           | rat         | ab25375          |
| Lectin-T1<br>Fluorescein                                           | Vector laboratories | 1:200           |             | FL1171           |
| Madcam-1                                                           | Santa Cruz          | 1:500           | rat         | sc-19604         |
| F4/80                                                              | Abcam               | 1:100           | rabbit      | ab111101         |
| Podocalyxin                                                        | R&D Systems         | 1:1000          | rat         | MAB1556          |
| BrDu                                                               | Abcam               | 1:1000          | sheep       | ab1893           |
| NeuN                                                               | Abcam               | 1:1000          | rabbit      | ab104225         |
| CD68                                                               | Invitrogen          | 1:500           | rat         | MA516674         |
| Iba1                                                               | Wako                | 1:1000          | rabbit      | 019-19741        |
| Ki67                                                               | Fisher Scientific   | 1:1000          | rat         | 14-5698-82       |
| CC119                                                              | Invitrogen          | 1:100           | rabbit      | PA5109488        |
| CD3                                                                | R&D Systems         | 1:100           | rat         | MAB4841          |
| Laminin                                                            | Sigma               | 1:1000          | rabbit      | L9393            |
| TCR $\gamma\delta$                                                 | Invitrogen          | 1:100           | hamster     | 14-5711-85       |
| GFAP                                                               | Abcam               | 1:500           | goat        | ab53554          |
| Arg-1                                                              | Santa Cruz          | 1:500           | mouse       | sc-271430        |
| PD-1                                                               | Invitrogen          | 1:500           | rabbit      | PA5-20351        |
| NeuN                                                               | Abcam               | 1:1000          | mouse       | ab104224         |
| IGg2a                                                              | Novus Biologicals   | 1:200           | goat        | NBP2-69581       |
| Donkey anti-rabbit<br>DAR 488                                      | Invitrogen          | 1:1000          | Donkey      | A21206           |
| Donkey anti-goat<br>DAG 488                                        | Invitrogen          | 1:1000          | Donkey      | A11055           |
| Donkey anti-sheep<br>DAS 488                                       | Invitrogen          | 1:1000          | Donkey      | A11015           |
| Goat anti-hamster<br>GAH 488                                       | Invitrogen          | 1:1000          | Donkey      | A21110           |
| Donkey anti-mouse<br>DAM 488                                       | Invitrogen          | 1:1000          | Donkey      | ab96875          |
| Donkey anti-goat<br>DAG 555                                        | Invitrogen          | 1:1000          | Donkey      | A21432           |
| Donkey anti-rabbit<br>DAR 555                                      | Invitrogen          | 1:1000          | Donkey      | A31572           |
| Donkey anti-rat<br>DARat IgG h&l<br>Alexa fluor 647<br>preadsorbed | Abcam               | 1:1000          | Donkey      | AB150155-1001    |

**Table S2. List of the used antibodies and related references.**

| <b>Symbol</b> | <b>Name</b>                                | <b>Forward</b>              | <b>Reverse</b>             |
|---------------|--------------------------------------------|-----------------------------|----------------------------|
| ACTB          | Actin.beta                                 | AGGTCATCACTATTGGCAACGA      | CACAGGATTCCATACCCAAGAAG    |
| ARG1          | Arginase 1                                 | GAAAGTTCCCAGATGTACCAGGAT    | AATGTACACGATGTCTTTGGCAGAT  |
| CCL2          | Chemokine<br>(C-C motif)<br>ligand 2       | AAGCTGTAGTTTTTGTCCACCAAGCT  | TTGGTTCCGATCCAGGTTTTTAA    |
| CCL19         | Chemokine<br>(C-C motif)<br>ligand 19      | GCATCATCCGAAGACTGAAGAA      | TTTACTCAAGACACAGGGCTCCTT   |
| CCL21         | Chemokine<br>(C-C motif)<br>ligand 21      | GGGAACCTCTAAGTCTGGAAAGAA    | CGTGAACCACCCAGCTTGA        |
| CD4           | CD4 antigen                                | CTCTGAGGAGCAGAAAGTAGTTCAAG  | CCAGGAACACTGTCTGGTTCAC     |
| CD8A          | CD8a antigen                               | AAATGTCCCAGGCCGCTAGT        | GCGGTGCCATTTTACACAATT      |
| CD8B          | CD8b antigen                               | CGAAGCTGACTGTGGTTGATGT      | TTCATCTTCAGGGTAGTCTTCTTGGT |
| ITGAM         | ITGAM<br>antigen                           | TCATCAACACAACCAGAGTGGATT    | AGGTGCTCCTAAAACCAAGCTTT    |
| ITGAX         | ITGAX<br>antigen                           | TGATAGTTCCTGGGTGGTGGTT      | TGTAGAGGCCACCTATTTGGTTAGT  |
| CD14          | CD14 antigen                               | GCCTTTCTCGGAGCCTATCTG       | CAACAGCAACAAGCCAAGCA       |
| CD19          | CD19 antigen                               | CTGTATGGTTTTCTCTGGTGGCTTT   | GTCATTGCTTCCTTTTCCTTCT     |
| CD80          | CD80 antigen                               | AATAACAGTCGTCGTCATCGTTGT    | CTGCTTGCCTCATTCTTCTGA      |
| CD86          | CD86 antigen                               | TGTGGCATATGACCGTTGTGT       | TCTTGAGTGA AATTGAGAGGTTTGG |
| CGAS          | Cyclic GMP-<br>AMP<br>Synthase             | GAGGCGCGGAAAGTCGTAA         | TTGTCCGGTTCCTTCCTGGA       |
| CHIL3         | Chil3 -<br>chitinase-like<br>1             | AGATCACTTACACACATGAGCAAGACT | TCAGTGTTCTTGTCTTTCAGACCAT  |
| CSF1          | Colony<br>stimulating<br>factor 1          | CCAAGGAGGTGTCAGAACACTGT     | AAAGGCAATCTGGCATGAAGTC     |
| CSF2          | Colony<br>stimulating<br>factor 2          | CAGCCAGCTACTACCAGACATACTG   | CGCATAGGTGGTAACTTGTGTTTC   |
| CXCL12        | Chemokine<br>(C-X-C<br>motif) ligand<br>12 | CTGTGCCCTTCAGATTGTTG        | TAATTTCCGGGTCAATGCACA      |
| CX3CL1        | C-X3-C<br>Motif<br>Chemokine<br>Ligand 1   | ACGAATCCCAGTGGCTTTGC        | GTGTCGTCTCCAGGACAATGG      |
| FOXP3         | Forkhead box<br>P3                         | TTTACTCGCATGTTTCGCCTACTT    | CTCAAATTCATCTACGGTCCACACT  |
| IFNG          | Interferon<br>gamma                        | ATGAACGCTACACACTGCATC       | CCATCCTTTTGCCAGTTCCTC      |
| IL1A          | Interleukin 1<br>alpha                     | GCACCTTACACCTACCAGAGT       | AAACTTCTGCCTGACGAGCTT      |
| IL1B          | Interleukin 1<br>beta                      | GAAGAAGAGCCCATCCTCTGT       | TGTTTTCATCTCGGAGCCTGTA     |
| IL2           | Interleukin 2                              | CAGGATGCTCACCTTCAAATTTTAC   | CGCAGAGGTCCAAGTTCATCT      |
| IL4           | Interleukin 4                              | GAGAGAGATCATCGGCATTTTGA     | TTCGTTGCTGTGAGGACGTTT      |
| IL6           | Interleukin 6                              | ACTCCCAACAGACCTGTCTATACCA   | TGCCATTGCACA ACTCTTTTCT    |
| IL10          | Interleukin 10                             | ATAAGCTCCAAGACCAAGGTGTCT    | ACACACTGCAGGTGTTTTAGCTTTT  |
| IL12          | Interleukin 12                             | AGACATCACACGGGACCAAAAC      | CCAGGCAACTCTCGTTCCTTGT     |

|        |                                                      |                             |                          |
|--------|------------------------------------------------------|-----------------------------|--------------------------|
| IL17   | Interleukin 17                                       | GGAGAGCTTCATCTGTGTCTCTGA    | ATCGCTGCTGCCTTCACTGT     |
| IL23A  | Interleukin 23                                       | CCAGCGGGACATATGAATCTACT     | TCACAACCATCTTCACACTGGAT  |
| LTA    | Lymphotoxin Alpha                                    | CACTTGACCCATGGCATCCT        | GTTGCTCAAAGAGAAGCCATGTC  |
| LTB    | Lymphotoxin Beta                                     | GGGAACCAGAAACTGACCTCAA      | CGCTCCTCAGAAACGCTTCTT    |
| MRC1   | Mannose receptor. C type 1                           | GAGGGAAGCGAGAGATTATGGA      | GCCTGATGCCAGGTTAAAGCA    |
| NOS2   | Nitric oxide synthase 2. inducible Gene              | GGGCTGTCACGGAGATCA          | CCATGATGGTCACATTCTGC     |
| PD1    | Programmed Cell Death 1                              | AGCTCGTGGTAACAGAGAGAATCC    | AGGGCACTCATGATACCAATGA   |
| PDL1   | Programmed cells death ligand 1                      | GCTGGATCCACGGAAATTCTC       | TGCGGACTACAAGCGAATCA     |
| P2RY12 | Purinergic receptor P2Y. G-protein coupled 12        | GAACGCCTGCCTTGATCCAT        | TGGTTCGCCACCTTCTTGTC     |
| RORC   | RAR-related orphan receptor gamma                    | CCATATTTGACTTTTCCCACTTCTCCT | GCAGATGTTCCACTCTCCTCTTC  |
| STING1 | Stimulator of interferon response cGAMP interactor 1 | GGTCACCGCTCCAAATATGTAG      | CAGTAGTCCAAGTTCGTGCGA    |
| TGFB   | Transforming growth factor. beta 1                   | TGGAGCAACATGTGGAACTC        | CAGCAGCCGGTTACCAAG       |
| TLR2   | Toll-like receptor 2                                 | GAATTGCATCACCGGTCAGAA       | CCTCTGAGATTTGACGCTTTGTC  |
| TLR4   | Toll- like receptor 4                                | TTCTTCTCCTGCCTGACACCA       | GGAATGTCATCAGGGACTTTGC   |
| TNFA   | Tumor necrosis factor alpha                          | CACCGTCAGCCGATTGTC          | TGAGTTGGTCCCCCTTCTCC     |
| TREMP2 | Triggering receptor expressed on myeloid cells 2     | TTCAGATCCTCACTGGACCC        | CCTGGCTGGACTTAAGCTGT     |
| VEGFC  | Vascular endothelial growth factor C                 | GCATGAACACCAGCACAGGTTA      | GCCTTGTGAGAGAGGCACTGTAAT |

**Table S3. List of couples of primers used for quantitative PCR.**

**a** Correlations between vascular and immune markers

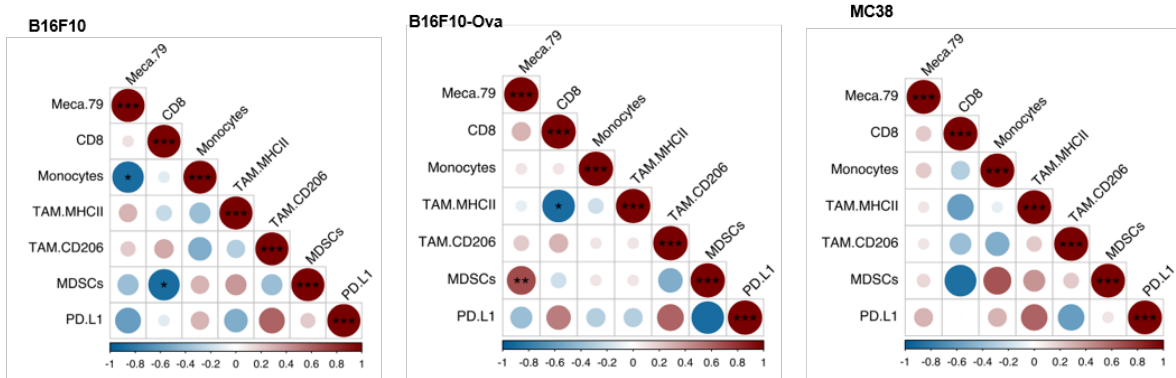

**b** Immunoscore

| Treatment      | CD8 <sup>+</sup> cells (n/μm <sup>2</sup> ) | Score | HEVs (MECA79 <sup>+</sup> cells, % of total area) | Score | Monocytes (CD11b <sup>+</sup> GR1 <sup>+</sup> cells · n/mm <sup>2</sup> ) | Score | MHCII <sup>+</sup> cells (n/mm <sup>2</sup> ) | Score | Immunoscore |
|----------------|---------------------------------------------|-------|---------------------------------------------------|-------|----------------------------------------------------------------------------|-------|-----------------------------------------------|-------|-------------|
| B16F10         | 9.013                                       | 0     | 0.960                                             | 0     | 72.100                                                                     | 1     | 72.101                                        | 0     | 1           |
|                | 6.008                                       | 0     | 3.005                                             | 1     | 36.050                                                                     | 0     | 130.683                                       | 1     | 2           |
|                | 12.017                                      | 1     | 3.270                                             | 2     | 18.025                                                                     | 0     | 78.860                                        | 0     | 3           |
|                | 12.017                                      | 1     | 1.660                                             | 0     | 45.063                                                                     | 0     | 114.911                                       | 0     | 1           |
|                | 12.017                                      | 1     | 2.080                                             | 0     | 54.070                                                                     | 1     | 90.126                                        | 0     | 2           |
| B16F10-Ova     | 24.034                                      | 2     | 3.210                                             | 1     | 207.290                                                                    | 2     | 207.290                                       | 1     | 6           |
|                | 12.017                                      | 1     | 4.856                                             | 3     | 351.400                                                                    | 3     | 259.113                                       | 1     | 8           |
|                | 15.021                                      | 2     | 2.947                                             | 1     | 216.302                                                                    | 2     | 196.024                                       | 1     | 6           |
|                | 0.000                                       | 0     | 3.113                                             | 1     | 36.050                                                                     | 0     | 459.643                                       | 3     | 4           |
|                | 3.004                                       | 0     | 1.250                                             | 0     | 261.360                                                                    | 3     | 416.833                                       | 2     | 5           |
| MC38           | 75.105                                      | 3     | 5.470                                             | 3     | 234.320                                                                    | 2     | 414.580                                       | 2     | 10          |
|                | 45.063                                      | 3     | 5.720                                             | 3     | 243.340                                                                    | 2     | 351.492                                       | 2     | 10          |
|                | 51.072                                      | 3     | 3.450                                             | 2     | 171.230                                                                    | 1     | 259.113                                       | 1     | 7           |
|                | 27.038                                      | 2     | 3.770                                             | 2     | 360.500                                                                    | 3     | 585.820                                       | 3     | 10          |
|                | 30.042                                      | 2     | 4.136                                             | 2     | 126.176                                                                    | 1     | 675.946                                       | 3     | 8           |
| <b>Score</b>   |                                             |       |                                                   |       |                                                                            |       |                                               |       |             |
| Maximum        | 75.105                                      | 3     | 5.720                                             | 3     | 360.500                                                                    | 3     | 675.946                                       | 3     |             |
| 75% percentile | 30.042                                      |       | 4.136                                             |       | 243.340                                                                    |       | 416.833                                       |       |             |
| 75% percentile | 30.042                                      | 2     | 4.136                                             | 2     | 243.340                                                                    | 2     | 416.833                                       | 2     |             |
| Median         | 12.017                                      |       | 3.210                                             |       | 171.230                                                                    |       | 259.113                                       |       |             |
| Median         | 12.017                                      | 1     | 3.210                                             | 1     | 171.230                                                                    | 1     | 259.113                                       | 1     |             |
| 25% percentile | 9.013                                       |       | 2.080                                             |       | 45.063                                                                     |       | 114.911                                       |       |             |
| 25% percentile | 9.013                                       | 0     | 2.080                                             | 0     | 45.063                                                                     | 0     | 114.911                                       | 0     |             |
| Minimum        | 0.000                                       |       | 0.960                                             |       | 18.025                                                                     |       | 72.101                                        |       |             |

**c** Immunosuppressive Score

| Treatment      | PD-L1 (% of total cells) | Score | MDSCs (n/mm <sup>2</sup> ) | Score | CD206 (n/mm <sup>2</sup> ) | Score | Immunosuppressive score |
|----------------|--------------------------|-------|----------------------------|-------|----------------------------|-------|-------------------------|
| B16F10         | 94.620                   | 3     | 126.177                    | 2     | 423.593                    | 2     | 7                       |
|                | 88.050                   | 1     | 180.252                    | 3     | 419.087                    | 2     | 6                       |
|                | 88.660                   | 1     | 81.114                     | 1     | 675.946                    | 3     | 5                       |
|                | 91.190                   | 2     | 117.164                    | 2     | 648.908                    | 3     | 7                       |
|                | 67.660                   | 1     | 99.139                     | 2     | 225.315                    | 0     | 3                       |
| B16F10-Ova     | 96.610                   | 3     | 135.189                    | 2     | 430.352                    | 3     | 8                       |
|                | 91.620                   | 2     | 234.328                    | 3     | 351.492                    | 1     | 6                       |
|                | 93.690                   | 2     | 153.214                    | 3     | 247.847                    | 0     | 5                       |
|                | 92.410                   | 2     | 162.227                    | 3     | 254.606                    | 1     | 6                       |
|                | 94.790                   | 3     | 63.088                     | 1     | 414.580                    | 2     | 6                       |
| MC38           | 38.050                   | 1     | 18.025                     | 0     | 123.923                    | 0     | 1                       |
|                | 13.800                   | 0     | 45.063                     | 1     | 344.732                    | 1     | 2                       |
|                | 10.320                   | 0     | 18.025                     | 0     | 259.113                    | 1     | 1                       |
|                | 15.890                   | 0     | 54.076                     | 1     | 180.252                    | 0     | 1                       |
|                | 14.780                   | 0     | 36.050                     | 0     | 403.314                    | 2     | 2                       |
| <b>Score</b>   |                          |       |                            |       |                            |       |                         |
| Maximum        | 96.610                   | 3     | 234.320                    | 3     | 675.946                    | 3     |                         |
| 75% percentile | 93.690                   |       | 153.210                    |       | 423.593                    |       |                         |
| 75% percentile | 93.690                   | 2     | 153.210                    | 2     | 423.593                    | 2     |                         |
| Median         | 88.660                   |       | 99.138                     |       | 351.492                    |       |                         |
| Median         | 88.660                   | 1     | 99.138                     | 1     | 351.492                    | 1     |                         |
| 25% percentile | 15.890                   |       | 45.063                     |       | 247.847                    |       |                         |
| 25% percentile | 15.890                   | 0     | 45.063                     | 0     | 247.847                    | 0     |                         |
| Minimum        | 10.320                   |       | 18.025                     |       | 123.923                    |       |                         |

**Figure S1. Marker labeling to calculate immune- and immune-suppressive scores. a.** Correlation between immunostaining items used to define immunoscore and immunosuppressive score. Heatmap of

Kendall correlation coefficients; only significant correlations (\*  $p < 0.05$ ; \*\*\*  $p < 0.0001$ ) are displayed (adjusted  $p$ -value  $< 0.05$ ) and values obtained in B16F10, B16F10-Ova and MC38 have been pooled. **b.** Tables recapitulating the immunoscore calculation methods in B16F10, B16F10-Ova and MC38 tumor slices. Densities of CD8<sup>+</sup> TLs, Meca-79<sup>+</sup> HEVs, CD11b<sup>+</sup> monocytes and MHCII<sup>+</sup> pro-inflammatory TAMs in tumors were converted into percentile values. **c.** Table recapitulating the immunosuppressive score calculation methods in B16F10, B16F10-Ova and MC38 tumor slices. Densities of CD206<sup>+</sup> pro-tumoral TAMs, CD11b<sup>+</sup>GR1<sup>+</sup> MDSCs and percentage of PD-L1<sup>+</sup> cells in tumors were converted into percentile values. **b and c.** Percentiles values were converted into score values with score 0 attributed to percentile values ranking from (0-25%), score 1 (25-50%), score 2 (50-70%), score 3 (75-100%). The mean of each score was then calculated to generate immunoscore or immunosuppressive score.

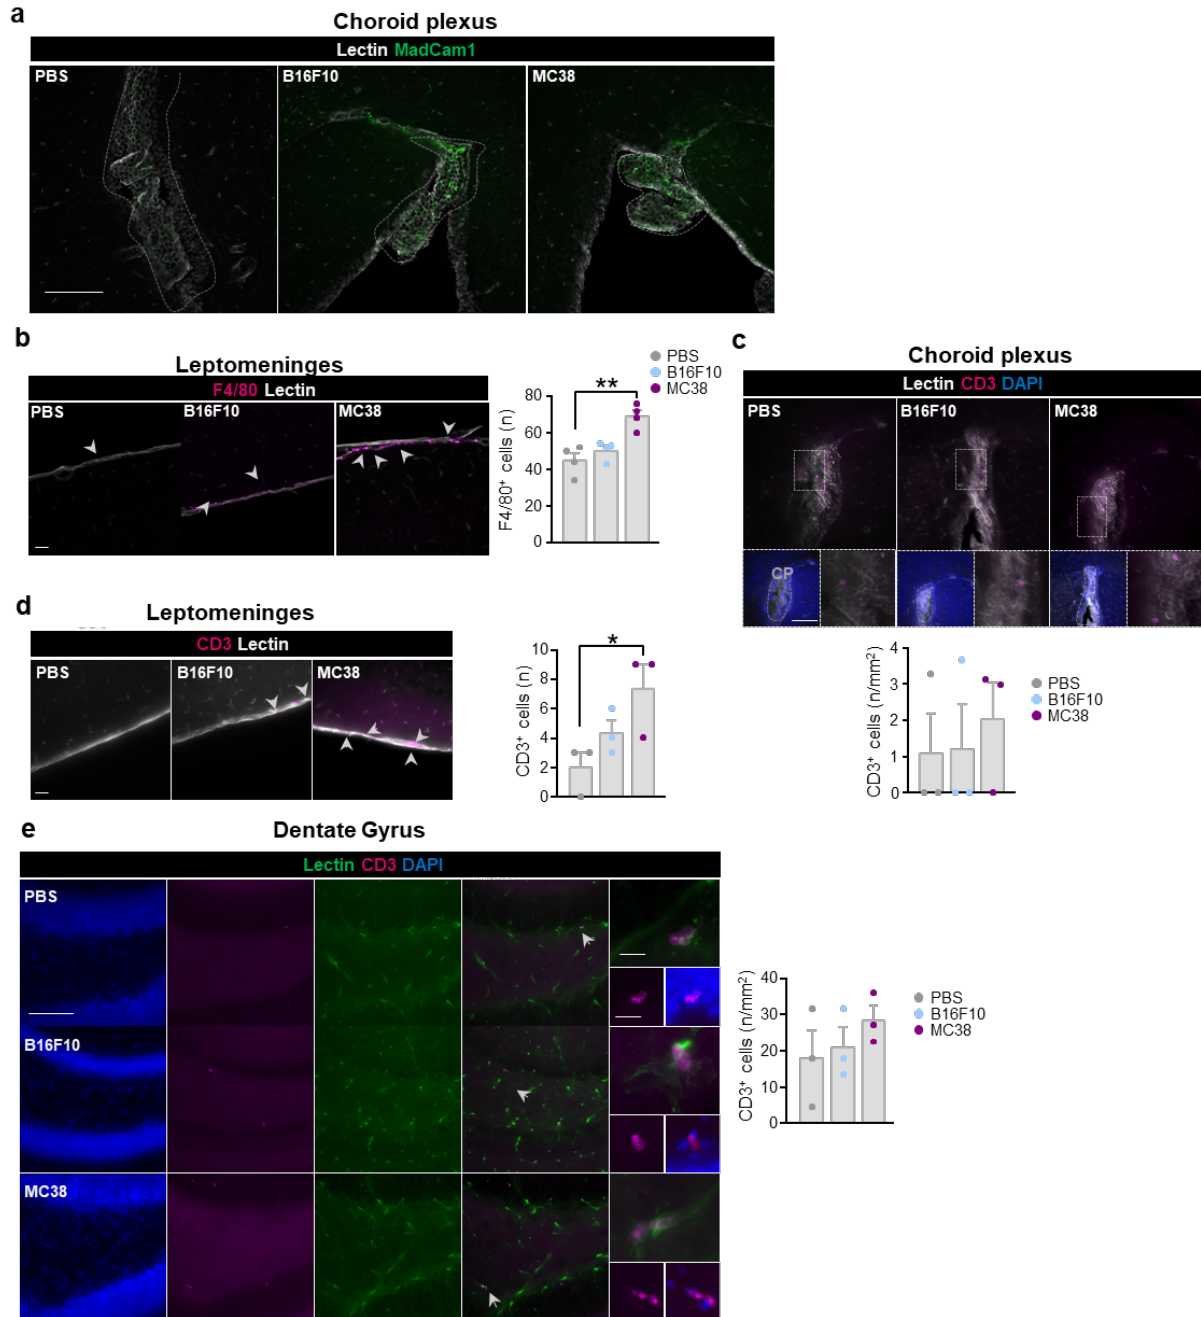

**Figure S2. Neuroinflammation in choroid plexus, leptomeninges and hippocampus in B16F10 and MC38 tumor-bearing mice.** **a.** Representative images of MadCam-1<sup>+</sup> (green) and Lectin<sup>+</sup> (grey) immunoreactivity in choroid plexus of PBS-control or B16F10 and MC38 mice. Scale bar: 100  $\mu$ m. **b.** Representative images of Lectin (gray) and F4/80 (magenta) immunoreactivity in choroid plexus and leptomeninges of PBS-control or B16F10 and MC38 mice. Scale bar: 50  $\mu$ m. Data are represented as bars with symbols for individual data points and they are expressed by mean  $\pm$  SEM ( $n=4$ ), \*\*  $p<0.01$ . One-way ANOVA with Dunnett's multiple comparisons test. **c.** Representative images and statistical quantification of the number of CD3<sup>+</sup> TLs (CD3<sup>+</sup>, magenta) in choroid plexus (Lectin<sup>+</sup>, grey) of B16F10- and MC38-bearing mice compared to PBS-injected controls. Boxed areas represent lateral ventricular localization (DAPI, blue) of Lectin<sup>+</sup> cells and magnification of CD3<sup>+</sup> TLs (magenta). Right, bars indicate statistical comparison of number of TLs (n/mm<sup>2</sup>, density) in B16F10- and MC38-mice compared to PBS-mice. Scale bar: 50  $\mu$ m, zoom 10  $\mu$ m. Data are represented as bars with symbols for individual data points and they are expressed by mean  $\pm$  SEM ( $n=3$ ), Kruskal-Wallis with Dunn's multiple comparisons test. **d.** Representative images and statistical quantification of number of T

lymphocytes (CD3<sup>+</sup>, magenta) in leptomeninges (Lectin<sup>+</sup>, grey) of B16F10- and MC38-bearing mice compared to PBS-injected controls. White arrows represent CD3<sup>+</sup> TLs (magenta). Right, bars indicate statistical comparison of number of TLs (n/mm<sup>2</sup>, density) in B16F10- and MC38-mice compared to PBS-mice. Scale bar: 50 μm. Data are represented as bars with symbols for individual data points and they are expressed by mean ± SEM (n=3), \* p<0.05. Kruskal-Wallis with Dunn's multiple comparisons test. **e.** Representative images of TLs (CD3<sup>+</sup>, magenta) cells, vessels (Lectin<sup>+</sup>, green) and cells nuclei (DAPI, blue immunoreactivity) in dentate gyrus of PBS and B16F10- and MC38-bearing mice. Bottom, histogram bars indicate statistical comparison of number of CD3<sup>+</sup> TLs (n/mm<sup>2</sup>, density) in B16F10- and MC38-mice compared to PBS-mice. Scale bars: 100 μm, zooms 50 μm and 10 μm. Data are expressed by mean ± SEM (n=3). One-way ANOVA with Dunnett's multiple comparisons test.

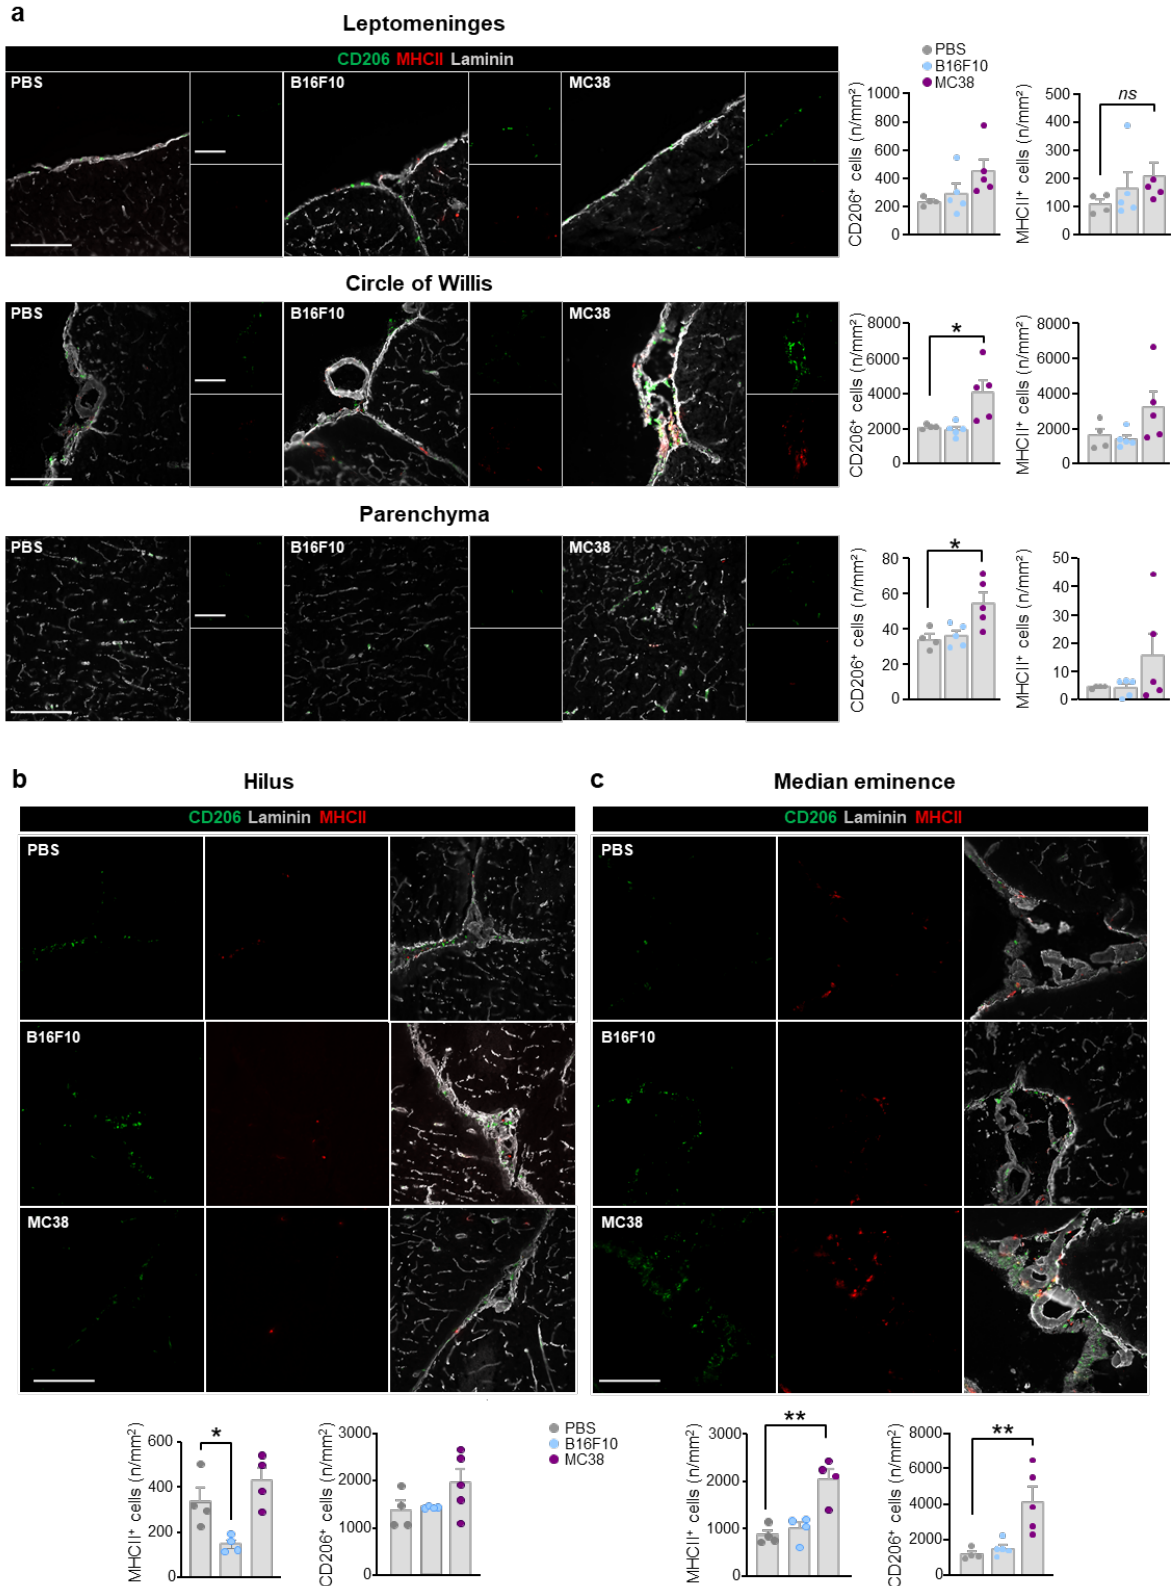

**Figure S3. Peripheral cancers are associated with myeloid cells in circumventricular organs of cancer-bearing mice.** Representative images and statistical quantification of density (n/mm<sup>2</sup>) of pro-tumoral (CD206<sup>+</sup>, green) and anti-tumoral (MHCII<sup>+</sup>, red) myeloid cells staining in perivascular and vascular Laminin<sup>+</sup> spaces (grey) of the leptomeninges, circle of Willis and Parenchyma (**a**), hilus (**b**) and median eminence (**c**) of B16F10- and MC38-bearing mice compared to PBS-controls. Scale bar:

100  $\mu\text{m}$ . Data are expressed as mean  $\pm$  SEM (n=4-5), \* p<0.05, \*\* p <0.01. ANOVA with Dunnett's or Kruskal-Wallis with Dunn's multiple comparisons test.

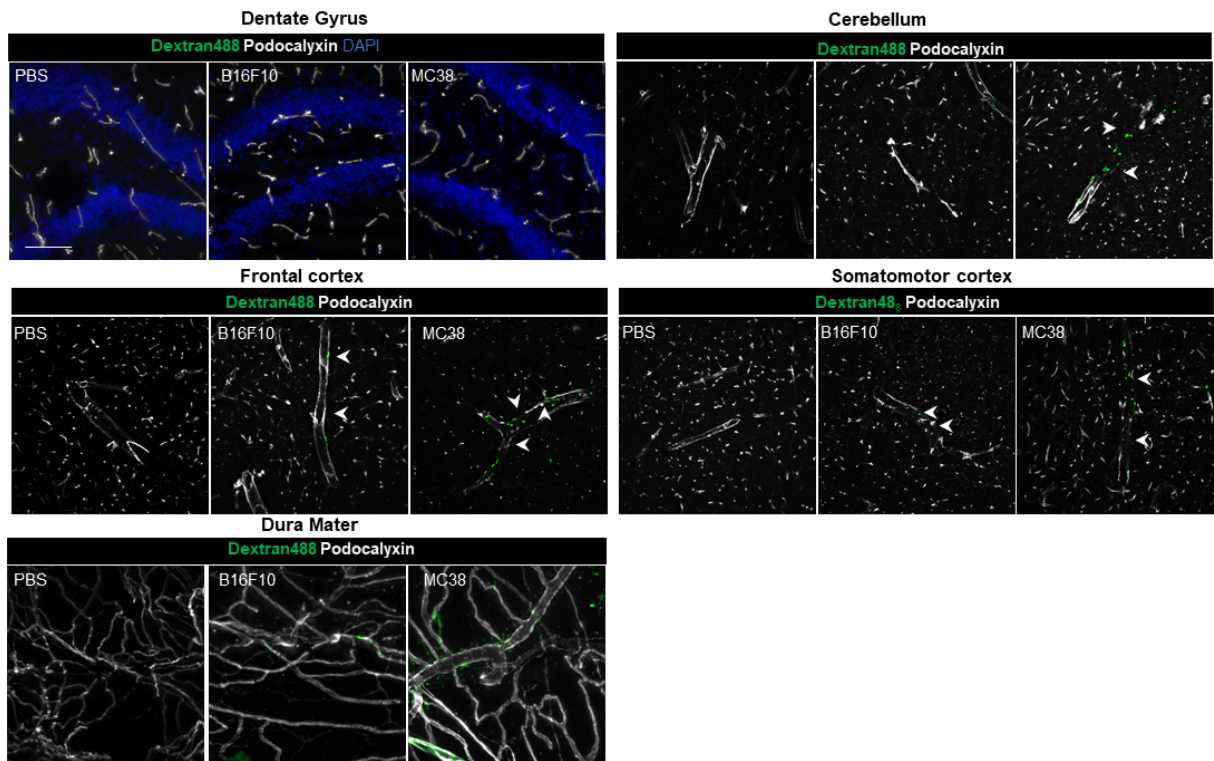

**Figure S4. Peripheral cancers are associated with blood-brain barrier permeability.** Representative microphotography showing Dextran<sub>488</sub> (green) extravasation from Podocalyxin<sup>+</sup> (grey) vessels in the dentate gyrus (upper panel, left), cerebellum (upper panel right), frontal cortex (lower panel, left), somatomotor cortex (lower panel, right), and the meningeal dura mater (lower left panel) of PBS and B16F10- and MC38-bearing mice. Scale bar: 50 μm.

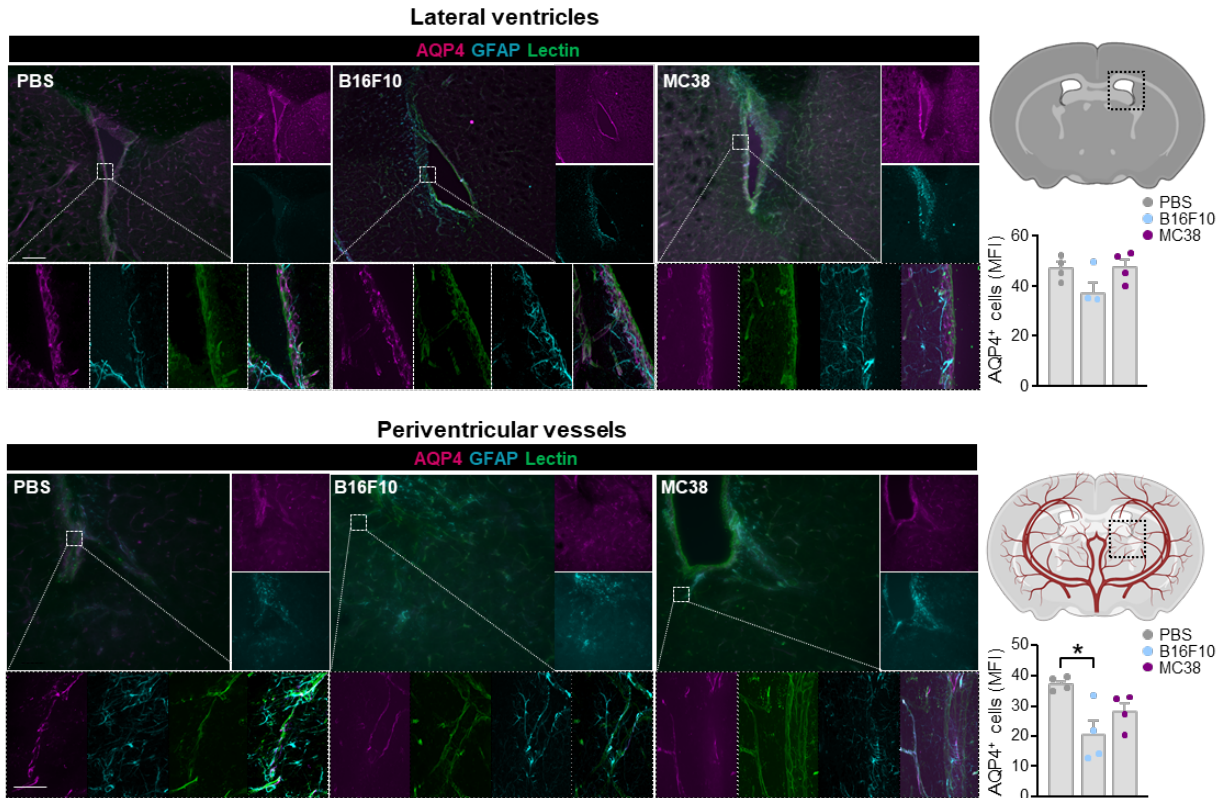

**Figure S5. Aquaporin 4 in lateral ventricles and perivascular vessels in B16F10 and MC38-cancer-bearing mice.** Upper panel, representative immunolabeling of Lectin<sup>+</sup> (green) vessels, AQP4<sup>+</sup> (magenta) and GFAP<sup>+</sup> (cyan) astrocytes in lateral ventricles of PBS, B16F10- and MC38 mouse brain slices. Boxed areas show magnification of AQP4<sup>+</sup>GFAP<sup>+</sup> astrocytes. Lower panel, representative immunolabeling of Lectin<sup>+</sup> periventricular vessels (green), AQP4<sup>+</sup> (magenta) and GFAP<sup>+</sup> (cyan) astrocytes of PBS, B16F10 and MC38 mouse brain slices. Boxed areas show magnification of AQP4<sup>+</sup>GFAP<sup>+</sup> astrocytes of Lectin<sup>+</sup> vessels. Right, histogram bars of quantification of AQP4 staining intensity expressed as median fluorescence intensity (MFI) in PBS, B16F10 and MC38 lateral ventricles and periventricular vessels. Scale bars: 200  $\mu$ m, zoom 10  $\mu$ m. Data are expressed as mean  $\pm$  SEM (n=4), \* p<0.05. One-way ANOVA with Dunnett's multiple comparisons test.

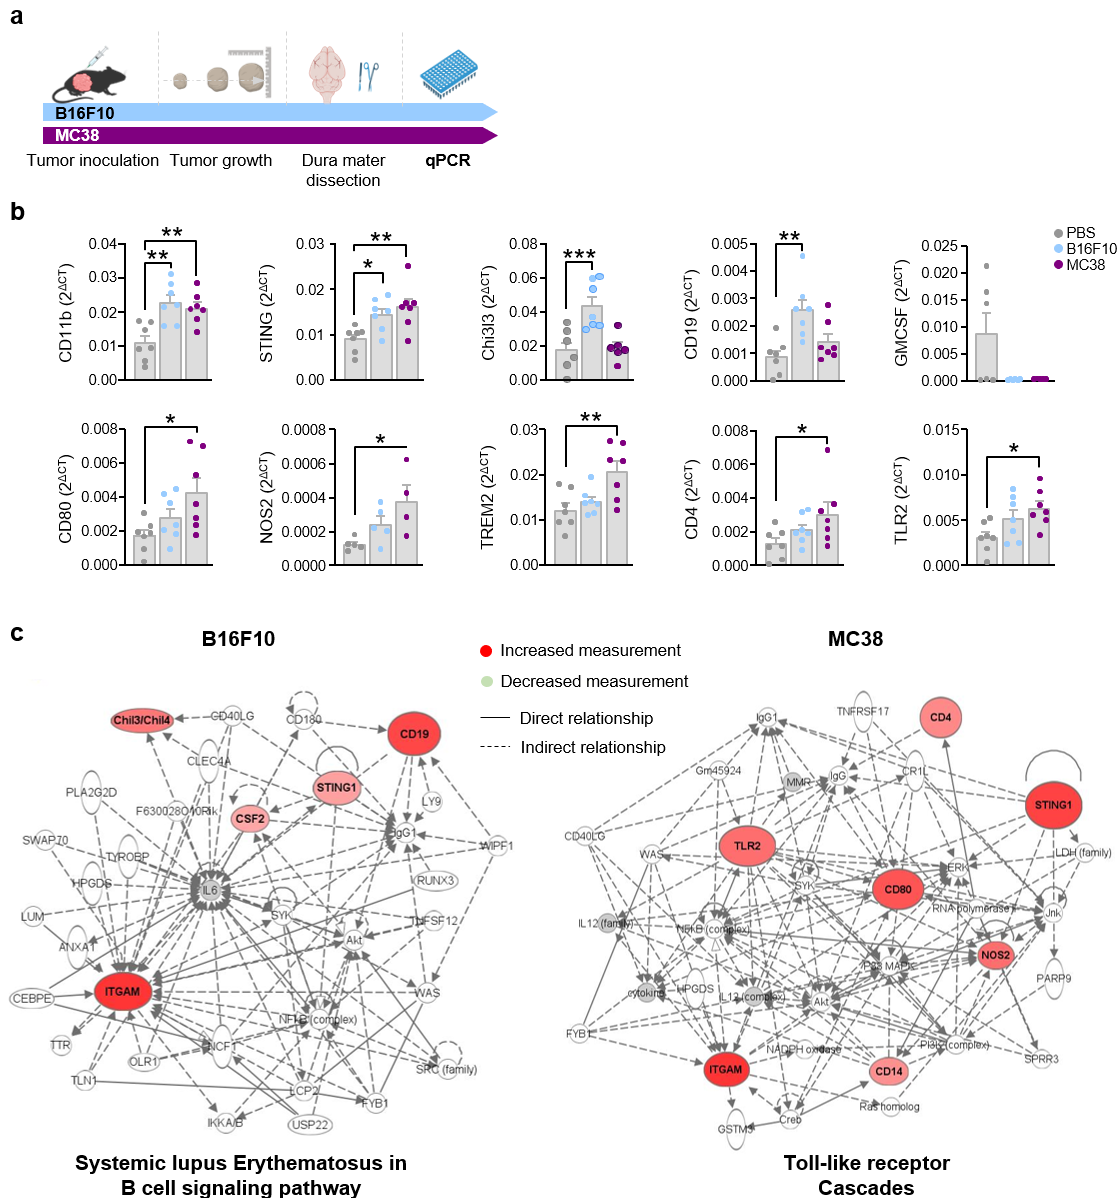

**Figure S6. Peripheral cancers are associated with inflammation in the Dura Mater meningeal layer.** **a.** Schematic diagram showing the timeline for dura mater isolation and qPCR analysis of inflammatory genes transcripts (n=48) in B16F10- (light blue) and MC38- (pink) bearing mice. **b.** Bars representing the statistical comparison of mRNA transcript levels expression of CD11b, STING, Chi3i3, CD19, GM-CSF, CD80, Nos2, CD4, TLR2 and TREM 2 in meningeal dura mater isolated from PBS, and B16- and MC38-bearing mice. Data are expressed as mean  $\pm$  SEM (n=6-7), \* p<0.05, \*\* p<0.01. One-way ANOVA with Dunnett's or Kruskal-Wallis with Dunn's multiple comparisons test. **c.** Gene interaction network maps generated by the Ingenuity Pathway Analysis (IPA) software representing one of the five canonical significant pathways from B16 (left) and MC38 (right) mice. In red, significant increased genes in each network.

**a Differential analysis of selected genes in meninges of B16F10 vs PBS mice by Ingenuity pathway**

| Top Canonical pathways (PBS vs B16F10)                   |                     |              |
|----------------------------------------------------------|---------------------|--------------|
| Name                                                     | p-value             | Overlap      |
| Systemic lupus Erythematosus in B Cell Signaling Pathway | 1.63E-04            | 0.6% (3/508) |
| Cgas-Sting Signaling Pathway                             | 3.87E-04            | 1.6% (2/124) |
| IL-17 Signaling                                          | 6.19E-04            | 1.3% (2/157) |
| IL-12 Signaling and Production in Macrophages            | 1.06E-03            | 1.0% (2/206) |
| Pathogen Induced Cytokine Storm Signaling Pathway        | 2.46E-03            | 0.6% (2/315) |
| Top Disease and Bio Functions                            |                     |              |
| Diseases and disorders                                   |                     |              |
| Name                                                     | p-value range       | # molecules  |
| Inflammatory Response                                    | 4.43E-02 – 6.06E-07 | 5            |
| Infectious Disease                                       | 2.48E-02 – 6.12E-07 | 4            |
| Organismal Injury and Abnormalities                      | 4.74E-02 – 6.12E-07 | 5            |
| Dermatological Disease                                   | 1.64E-02 – 1.55E-06 | 4            |
| Connective tissue disorders                              | 2.86E-02 – 2.46E-06 | 3            |
| Molecular and Cellular Functions                         |                     |              |
| Name                                                     | p-value range       | # molecules  |
| Cellular Movement                                        | 3.33E-02 – 2.58E-08 | 5            |
| Cell-To-Cell Signaling and Interaction                   | 3.33E-02 – 1.02E-06 | 4            |
| Cellular Development                                     | 4.82E-02 – 1.96E-06 | 4            |
| Cellular Death and Survival                              | 3.69E-02 – 1.05E-05 | 4            |
| Cellular Compromise                                      | 2.38E-02 – 1.41E-05 | 4            |
| Physiological System Development and Function            |                     |              |
| Name                                                     | p-value range       | # molecules  |
| Hematological System Development and Function            | 4.84E-02 – 2.58E-08 | 5            |
| Immune Cell Trafficking                                  | 3.33E-02 – 2.58E-08 | 5            |
| Tissue Morphology                                        | 4.04E-02 – 6.06E-07 | 5            |
| Lymphoid Tissue Structure and Development                | 4.82E-02 – 1.96E-06 | 5            |
| Connective Tissue Development and Function               | 4.80E-02 – 1.67E-05 | 4            |

**b Differential analysis of selected genes in meninges of MC38 vs PBS mice by Ingenuity pathway**

| Top Canonical pathways (PBS vs MC38)            |                     |              |
|-------------------------------------------------|---------------------|--------------|
| Name                                            | p-value             | Overlap      |
| Toll-Like Receptor Cascades                     | 9.95E-08            | 10.3% (3/29) |
| MSP-RON Signaling Pathway                       | 7.11E-07            | 5.5% (3/55)  |
| Neutrophil Extracellular Trap Signaling Pathway | 3.30E-06            | 1.1% (4/351) |
| Neutrophil Degranulation                        | 7.95E-06            | 0.9% (4/438) |
| Defensins                                       | 9.80E-06            | 14.3% (2/14) |
| Top Disease and Bio Functions                   |                     |              |
| Diseases and disorders                          |                     |              |
| Name                                            | p-value range       | # molecules  |
| Inflammatory Response                           | 4.90E-02 – 1.20E-10 | 7            |
| Infectious Disease                              | 2.00E-02 – 2.97E-10 | 6            |
| Organismal Injury and Abnormalities             | 4.96E-02 – 2.97E-10 | 7            |
| Endocrine System Disorders                      | 2.56E-02 – 3.65E-08 | 5            |
| Gastrointestinal Disease                        | 4.96E-02 – 3.65E-08 | 7            |
| Molecular and Cellular Functions                |                     |              |
| Name                                            | p-value range       | # molecules  |
| Cell-To-Cell Signaling Interaction              | 4.32E-02 – 1.20E-10 | 7            |
| Cellular Development                            | 3.08E-02 – 1.50E-09 | 7            |
| Cellular Growth and Proliferation               | 2.84E-02 – 1.50E-09 | 7            |
| Cellular Function and Maintenance               | 3.80E-02 – 5.64E-09 | 7            |
| Cell Death and Survival                         | 4.39E-02 – 3.65E-08 | 7            |
| Physiological System Development and Function   |                     |              |
| Name                                            | p-value range       | # molecules  |
| Hematological System Development and Function   | 4.56E-02 – 1.20E-10 | 7            |
| Immune Cell Trafficking                         | 4.56E-02 – 1.20E-10 | 7            |
| Organismal Survival                             | 1.06E-03 – 2.59E-09 | 7            |
| Tissue Morphology                               | 4.39E-02 – 1.67E-08 | 7            |
| Lymphoid Tissue Structure and Development       | 4.39E-02 – 6.37E-08 | 7            |

**Figure S7. Signaling pathway enhanced in dura mater of cancer-bearing mice.** Canonical pathway analysis, disease and function were studied by using the IPA system. The P-value of overlap <0.05 was set as the threshold and the significance level is obtained by Fisher's exact test at the right tail. IPA: ingenuity pathway analysis.

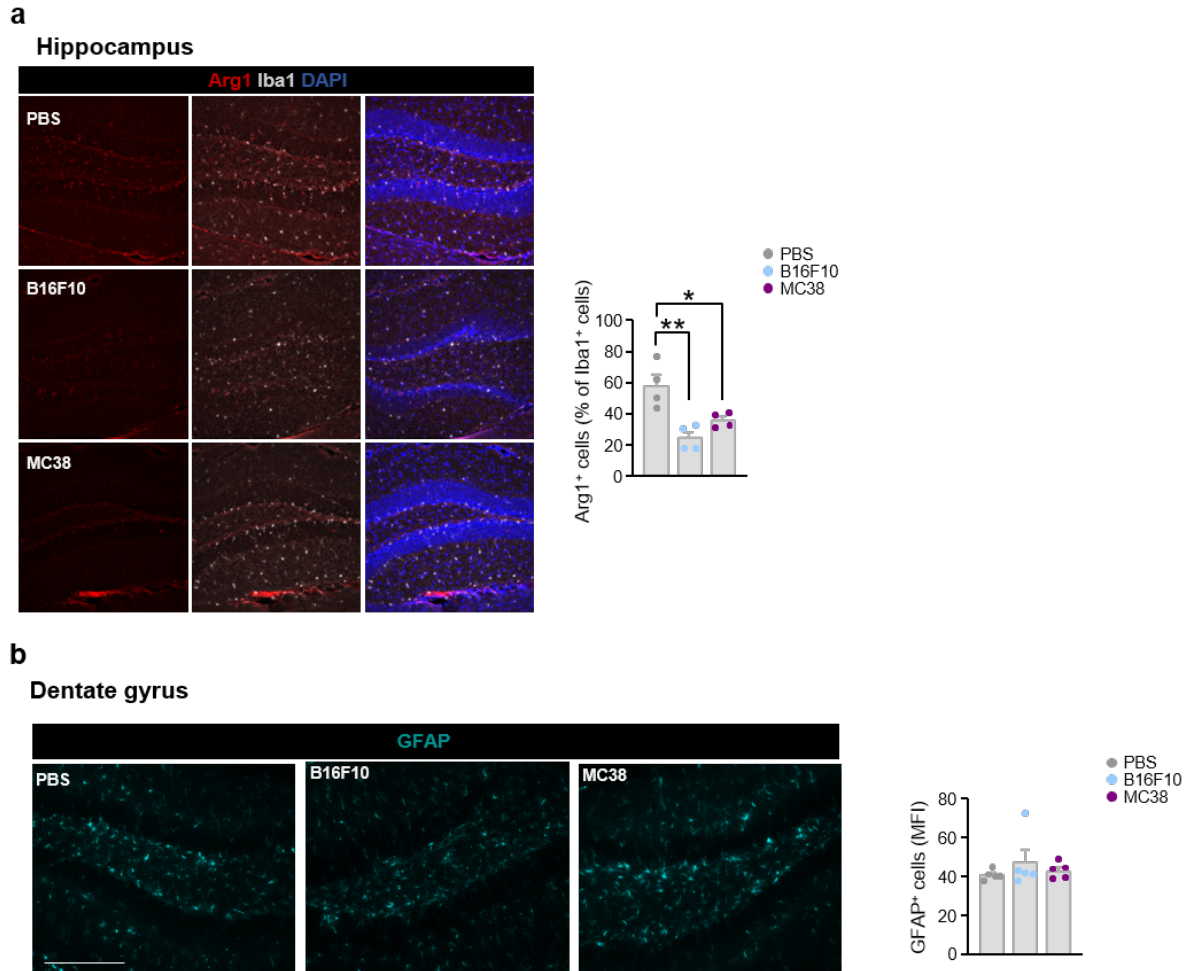

**Figure S8. Microglia reactivity in the hippocampus of B16F10- and MC38 cancer-bearing mice. a.** Immunofluorescence and statistical quantification of anti-inflammatory (Arg-1<sup>+</sup>, red) microglial cells (Iba1<sup>+</sup>, grey) in dentate gyrus (DAPI, blue) of B16F10- and MC38- bearing mice compared to PBS-mice. Scale bar: 100  $\mu$ m. Data are expressed as mean  $\pm$  SEM (n=4), \* p<0.05, \*\*p<0.01. One-way ANOVA with Dunnett's multiple comparisons test. **b.** Immunofluorescence of GFAP (n/mm<sup>2</sup>, cyan) in dentate gyrus (DAPI, blue) of B16F10- and MC38- bearing mice compared to PBS-mice. Scale bar: 100  $\mu$ m. Data are expressed as mean  $\pm$  SEM (n=5). One-way ANOVA with Dunnett's multiple comparisons test.

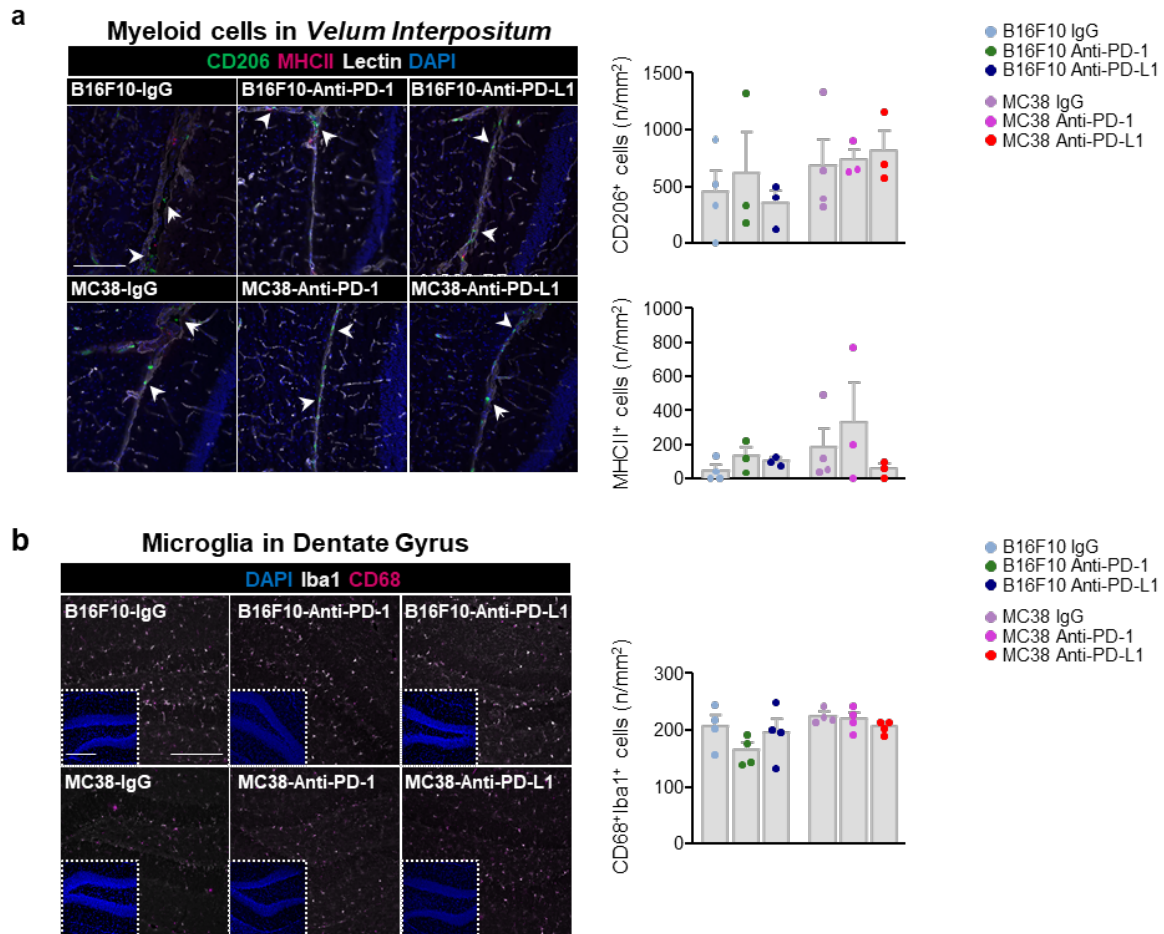

**Figure S9. Quantification of myeloid cells in circumventricular organs of cancer-bearing mice. a.** Immunofluorescence and statistical quantification of density ( $n/mm^2$ ) of pro-tumoral ( $CD206^+$ ) and anti-tumoral ( $MHCII^+$ ) myeloid cells staining in perivascular and vascular  $Lectin^+$  spaces (grey) of *Velum Interpositum* (left) of PBS-, B16F10- and MC38-bearing mice treated with anti-PD-1, anti-PD-L1 or IgG. Scale bar: 100  $\mu m$ . Data are expressed as mean  $\pm$  SEM ( $n=3-4$ ), One-way ANOVA with Dunnett's multiple comparisons test. **b.** Immunofluorescence and statistical quantification of microglial cells ( $Iba1^+$ , grey and  $CD68$ , magenta) in dentate gyrus (DAPI, blue) of PBS-, B16F10- and MC38-bearing mice treated with anti-PD-1, anti-PD-L1 or IgG. Scale bar: 100  $\mu m$ . Data are expressed as mean  $\pm$  SEM ( $n=4$ ), One-way ANOVA with Dunnett's multiple comparisons test.

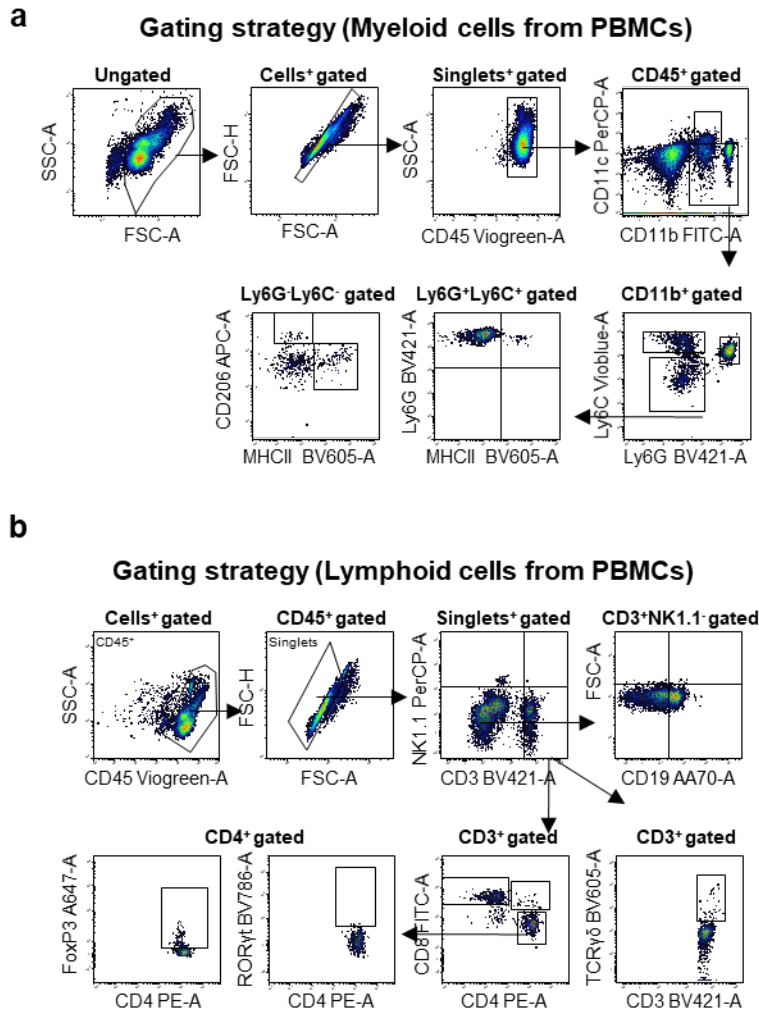

**Figure S10. Gating strategy for the analysis of peripheral blood immune cells by flow cytometry from B16F10- and MC38-bearing mice. a.** For myeloid panel, live cells were gated from FSC-A and SSC-A, singlets were gated from FSC-A and FSC-H, CD45 was used to identify leucocytes (CD45<sup>+</sup>). From these cells, CD11c and CD11b were used to identify dendritic cells (CD11c<sup>+</sup>CD11b<sup>+</sup>) and monocytes (CD11c<sup>+</sup>CD11b<sup>+</sup>). From CD11b<sup>+</sup> cells, Ly6C, Ly6G and MHCII were used to identify macrophages (CD11b<sup>+</sup>Ly6C<sup>+</sup>Ly6G<sup>+</sup>), neutrophils (CD11b<sup>+</sup>Ly6G<sup>+</sup>Ly6c<sup>+</sup>MHCII<sup>+</sup>), pro-tumoral macrophages (CD11b<sup>+</sup>Ly6C<sup>+</sup>Ly6G<sup>+</sup>CD206<sup>+</sup>), anti-tumoral macrophages (CD11b<sup>+</sup>Ly6C<sup>+</sup>Ly6G<sup>+</sup>MHCII<sup>+</sup>), M-MDSCs (CD11b<sup>+</sup>Ly6G<sup>+</sup>Ly6c<sup>high</sup>), PMN-MDSCs (CD11b<sup>+</sup>Ly6G<sup>+</sup>Ly6c<sup>low</sup>MHCII<sup>+</sup>). **b.** For lymphocytic panel, live cells were gated from FSC-A and SSC-A, singlets were gated from FSC-A and FSC-H, CD45 was used to identify leucocytes (CD45<sup>+</sup>). From these cells, CD3 and NK1.1 were used to identify lymphocytes (CD3<sup>+</sup>NK1.1<sup>-</sup>) and NK cells (CD3<sup>+</sup>NK1.1<sup>+</sup>). From CD3<sup>+</sup>NK1.1<sup>-</sup> cells, CD4 and CD8 were used to identify CD4 T cells (CD4<sup>+</sup>CD8<sup>-</sup>) and CD8 T cells (CD8<sup>+</sup>CD4<sup>-</sup>) and CD19 was used to identify B cells (CD19<sup>+</sup>). From CD3<sup>+</sup> cells, TCRγδ cells were identified by using TCRγδ (CD3<sup>+</sup>TCRγδ<sup>+</sup>). From CD4<sup>+</sup> cells, FoxP3 and RORγT were used to identify Treg cells (FoxP3<sup>+</sup>CD3<sup>+</sup>CD4<sup>+</sup>) and Th17 cells (CD3<sup>+</sup>CD4<sup>+</sup>RORγT<sup>+</sup>).

**Gating strategy B16F10, immune checkpoint inhibitors and anti-TCR**

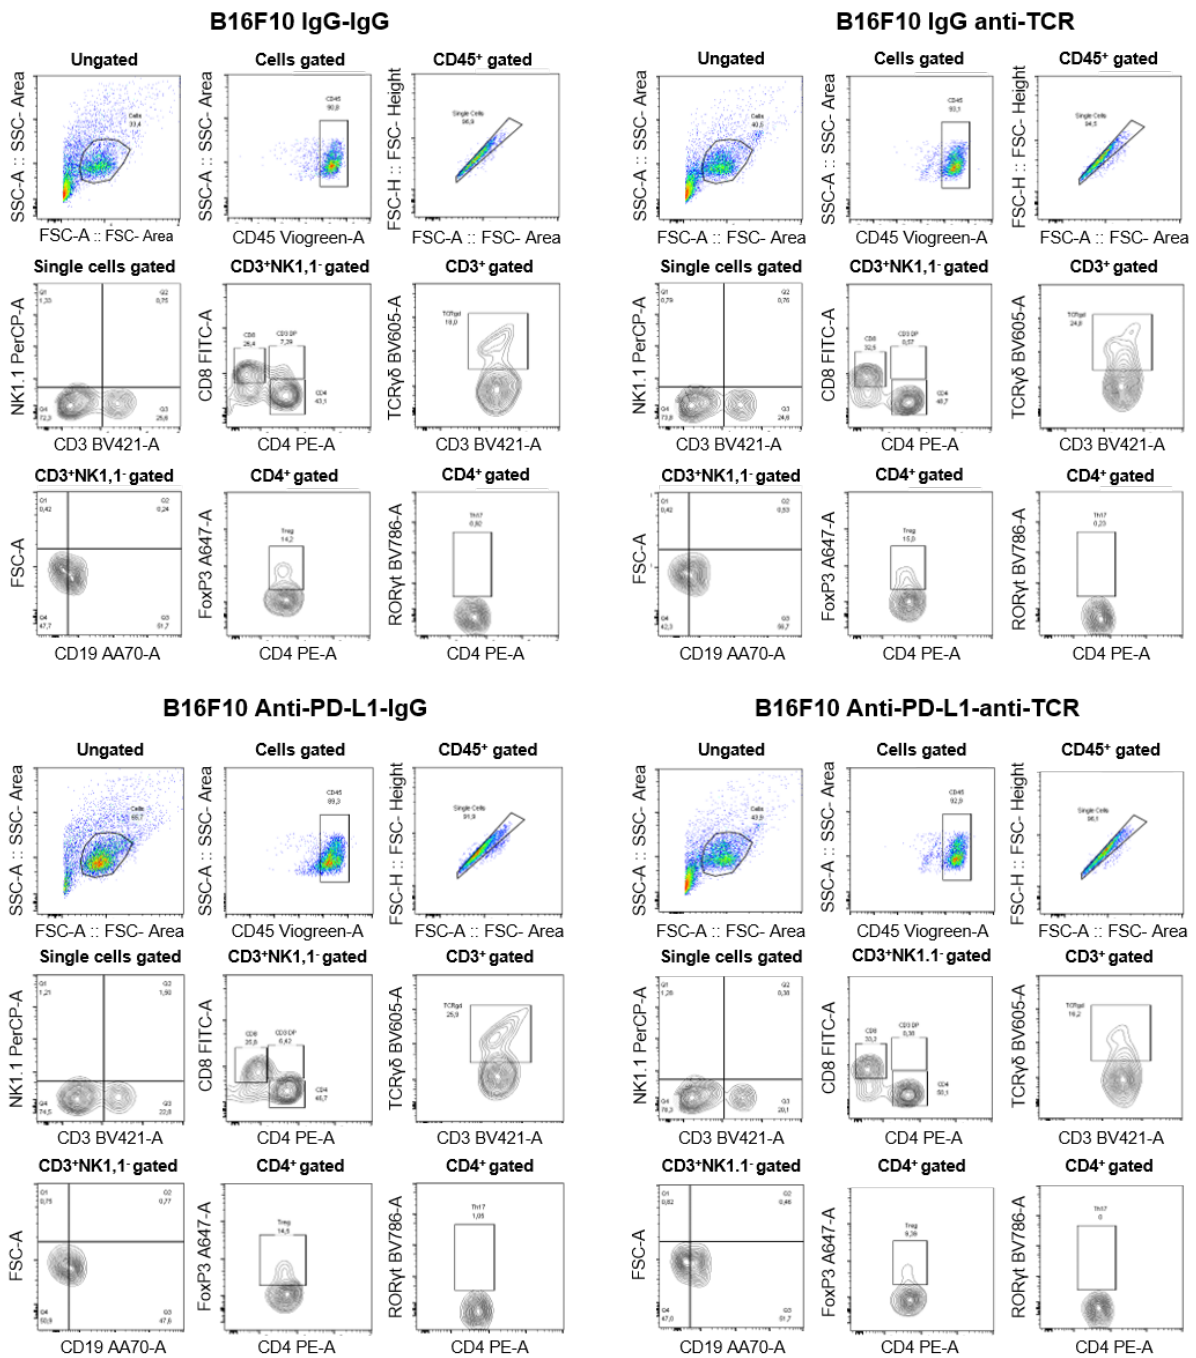

**Figure S11. Gating strategy for the analysis of peripheral blood cells by flow cytometry from B16F10-bearing mice treated with anti-PD-L1 and/or anti-TCRγδ.** Live cells were gated from FSC-A and SSC-A, singlets were gated from FSC-A and FSC-H, CD45 was used to identify leucocytes (CD45<sup>+</sup>). From these cells, CD3 and NK1.1 were used to identify lymphocytes (CD3<sup>+</sup>NK1.1<sup>-</sup>) and NK cells (CD3<sup>-</sup>, NK1.1<sup>+</sup>). From CD3<sup>+</sup>NK1.1<sup>-</sup> cells, CD4 and CD8 were used to identify CD4 T cells (CD4<sup>+</sup>CD8<sup>-</sup>) and CD8 T cells (CD8<sup>+</sup>CD4<sup>-</sup>) and CD19 was used to identify B cells (CD19<sup>+</sup>). From CD3<sup>+</sup> cells, TCRγδ cells were identified by using TCRγδ (CD3<sup>+</sup>TCRγδ<sup>+</sup>). From CD4<sup>+</sup> cells, FoxP3 and RORγT were used to identify Treg cells (FoxP3<sup>+</sup>CD3<sup>+</sup>CD4<sup>+</sup>) and Th17 cells (CD3<sup>+</sup>CD4<sup>+</sup>RORγT<sup>+</sup>).

## Gating strategy MC38, immune checkpoint inhibitors and anti-TCR

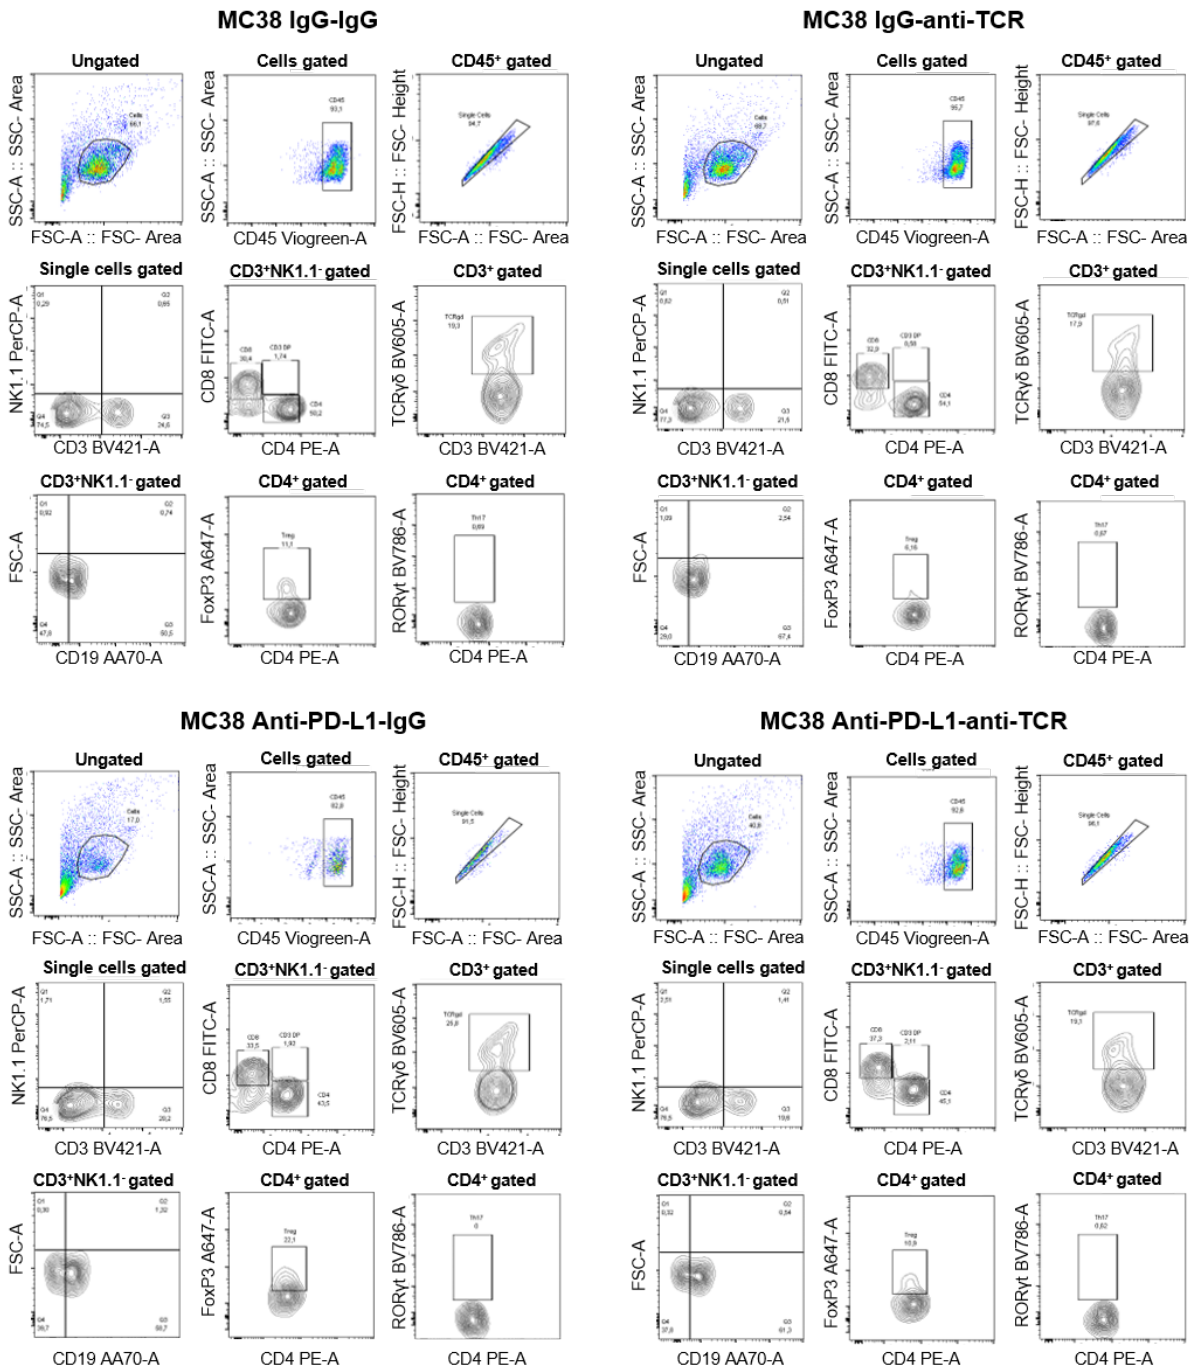

**Figure S12. Gating strategy for the analysis of peripheral blood cells by flow cytometry from MC38-bearing mice treated with anti-PD-L1 and/or anti-TCR $\gamma\delta$ .** Live cells were gated from FSC-A and SSC-A, singlets were gated from FSC-A and FSC-H, CD45 was used to identify leucocytes (CD45<sup>+</sup>). From these cells, CD3 and NK1.1 were used to identify lymphocytes (CD3<sup>+</sup>NK1.1<sup>-</sup>) and NK cells (CD3<sup>-</sup>, NK1.1<sup>+</sup>). From CD3<sup>+</sup>NK1.1<sup>-</sup> cells, CD4 and CD8 were used to identify CD4 T cells (CD4<sup>+</sup>, CD8<sup>-</sup>) and CD8 T cells (CD8<sup>+</sup>, CD4<sup>-</sup>) and CD19 was used to identify B cells (CD19<sup>+</sup>). From CD3<sup>+</sup> cells, TCR $\gamma\delta$  cells were identified by using TCR $\gamma\delta$  (CD3<sup>+</sup>TCR $\gamma\delta$ <sup>+</sup>). From CD4<sup>+</sup> cells, FoxP3 and ROR $\gamma$ T were used to identify Treg cells (FoxP3<sup>+</sup>CD3<sup>+</sup>CD4<sup>+</sup>) and Th17 cells (CD3<sup>+</sup>CD4<sup>+</sup>ROR $\gamma$ T<sup>+</sup>).

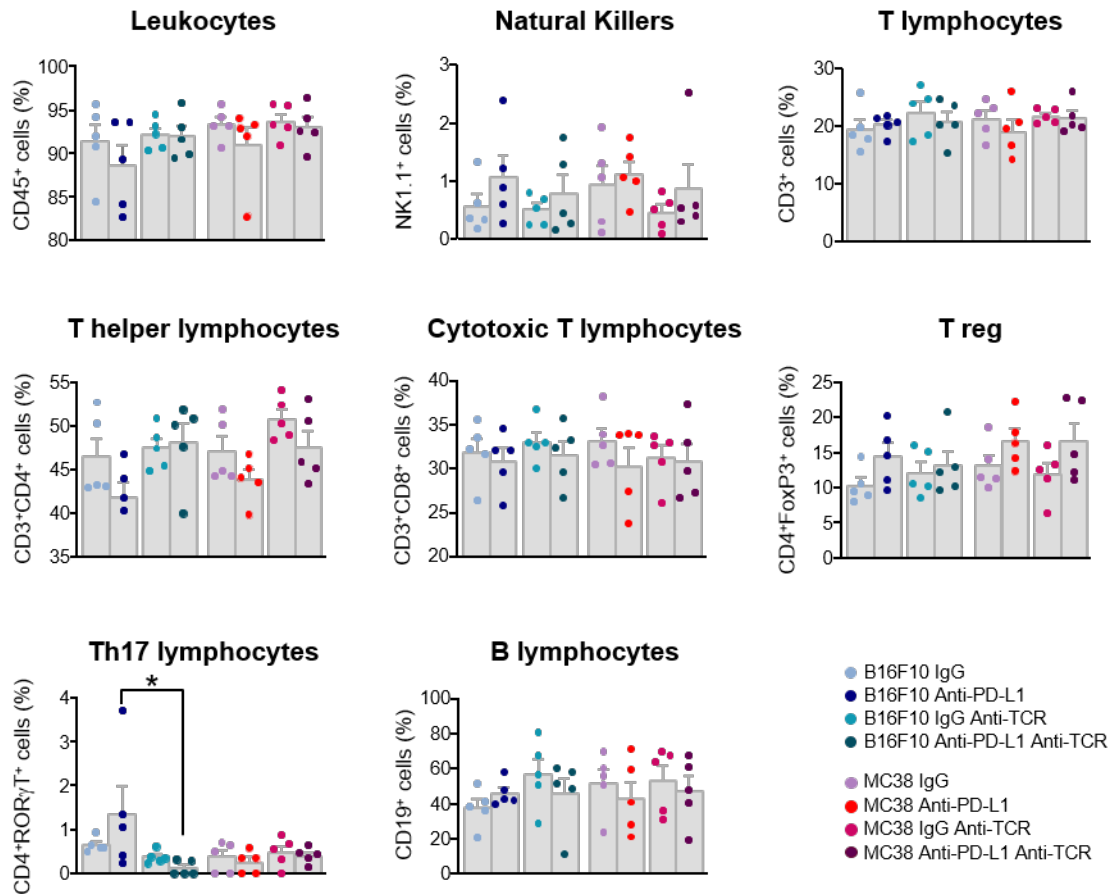

**Figure S13. Impact of anti-TCR $\gamma\delta$  on circulating immune cells of cancer-bearing mice treated with IgG, anti-PD1 or anti-PD-L1.** Impact of anti-TCR $\gamma\delta$  administration on the proportion of circulating CD45<sup>+</sup> leucocytes, CD3<sup>+</sup>-NK1.1<sup>+</sup> NK cells, CD3<sup>+</sup> TLs, CD3<sup>+</sup>CD4<sup>+</sup> T helper lymphocytes, CD3<sup>+</sup>CD8<sup>+</sup> T cytotoxic Lymphocytes, CD3<sup>+</sup>CD4<sup>+</sup>FoxP3<sup>+</sup> Treg cells, double positive CD4<sup>+</sup>CD8<sup>+</sup> TLs, CD4<sup>+</sup>CD19<sup>+</sup> B cells and CD3<sup>+</sup>CD4<sup>+</sup>ROR $\gamma$ T<sup>+</sup> Th17 cells in blood of B16F10- and MC38-bearing mice treated with anti-PD-L1 and IgG. Data are expressed as mean  $\pm$  SEM (n=4-5), \* p<0.05. One-way ANOVA with Sidak's multiple comparisons test.

### Dentate Gyrus

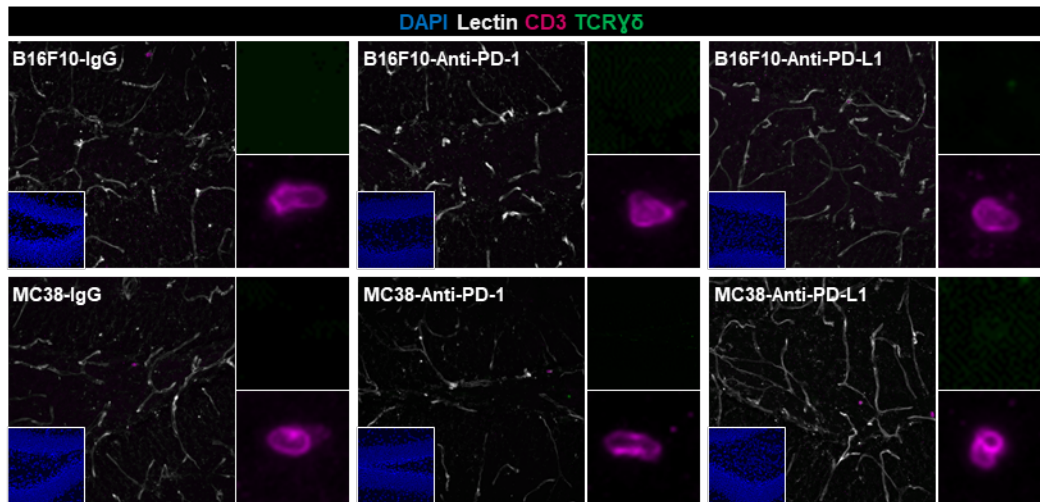

**Figure S14.  $\gamma\delta$ T lymphocytes infiltration in the hippocampus of cancer-bearing mice.** Representative images of CD3 TILs (magenta), TCR $\gamma\delta$  (green), Lectin (grey) and DAPI (blue) immunoreactivities in dentate gyrus of B16F10 or MC38-bearing mice treated with anti-PD-1, anti-PD-L1 or IgG. Scale bars: 50  $\mu$ m, zoom 10  $\mu$ m.
